# Supplementary material
Source: Springer Nature journal article supplement (https://www.springermedizin.de/resource/supplementary/13633_2014_352_MOESM10_ESM.pdf/9596138)

# ISS. Adult Height of Controls (Mean SDS & 95% CI) of Published Studies versus Adult Height of Treated Children in Our Study

Published Studies (number of subjects) [ref. #]

Lopez-Siguero et al 2000 (42) [4]

Coutant et al 2001 (51) [5]

Lopez-Siguero et al 1996 (44) [6]

Leschek et al 2004 (11) [1]

Hindmarsh et al 1996 (10) [7]

Buchlis et al 1998 (58) [8]

Albertsson-Wikland et al 2008 (19) [8]

McCaughey et al 1998 (6) [2]

Wit et al 2002 (64) [9]

Average of above studies

**OUR study (88)**

[SDS of Height]

-3.6 -3.4 -3.2 -3.0 -2.8 -2.6 -2.4 -2.2 -2.0 -1.8 -1.6 -1.4 -1.2 -1.0 -0.8 -0.6 -0.4

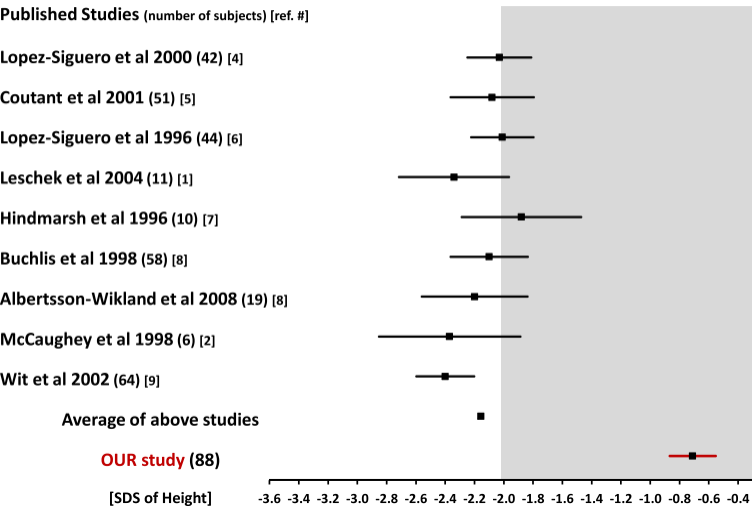

Supplement: MOESM10 [file 9596138]
